# Supplementary material for: Overexpression of the BRC repeat 8 of BRCA2 hyperstabilizes RAD51 and alters DNA repair dynamics
Source: Research Square preprint supplement (doi:10.21203/rs.3.rs-8590288/v1), 2026-02-23
Supplement: Supplementary file 1 [file 6a22b556141c6b06fc89dbbf.docx]

**Supplementary Material**

**Supplementary figures**


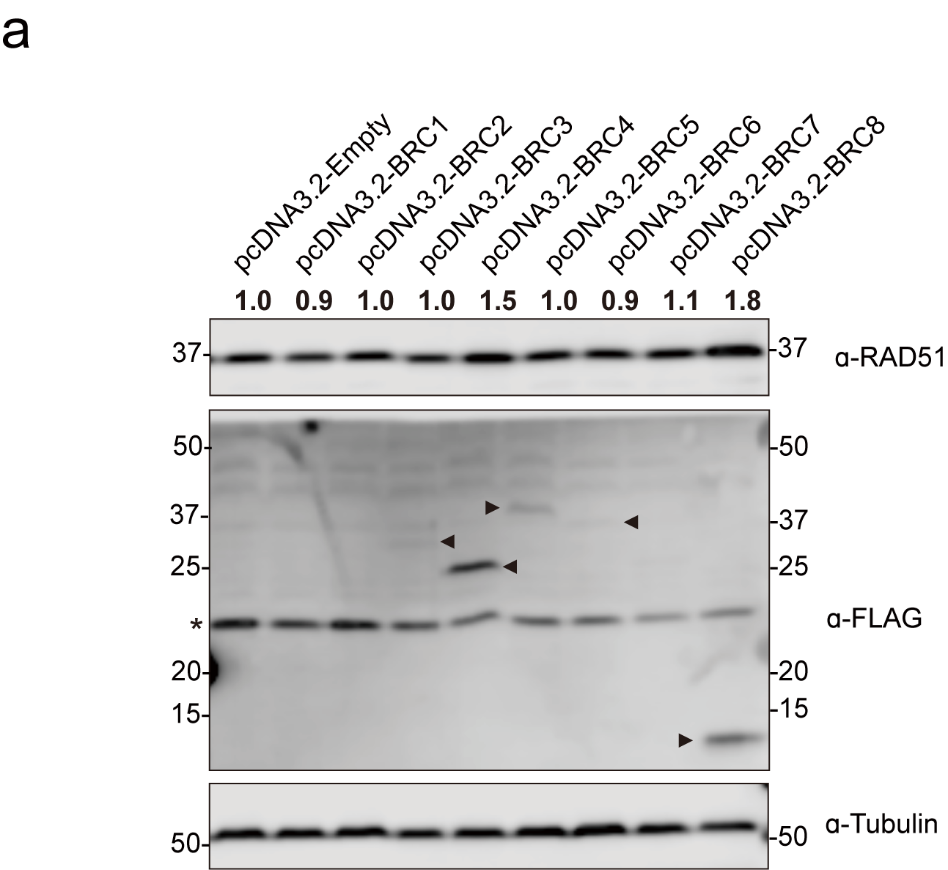


**Fig. s1** Effect of transient expression of a single BRCA2 BRC repeat on RAD51 protein levels. (A) Analysis of RAD51 expression in HeLa cells transiently transfected with FLAG-tagged BRCA2 or BRC repeat-expressing vector (pcDNA3.2-BRC1–8) or empty vector (pcDNA3.2-Empty). RAD51 protein levels were normalized to α-tubulin as a loading control. Fold changes in RAD51 expression relative to pcDNA3.2-Empty control are indicated above the blot. Non-specific bands are indicated by asterisks (*). BRC8 expression increased RAD51 protein levels (1.8-fold).


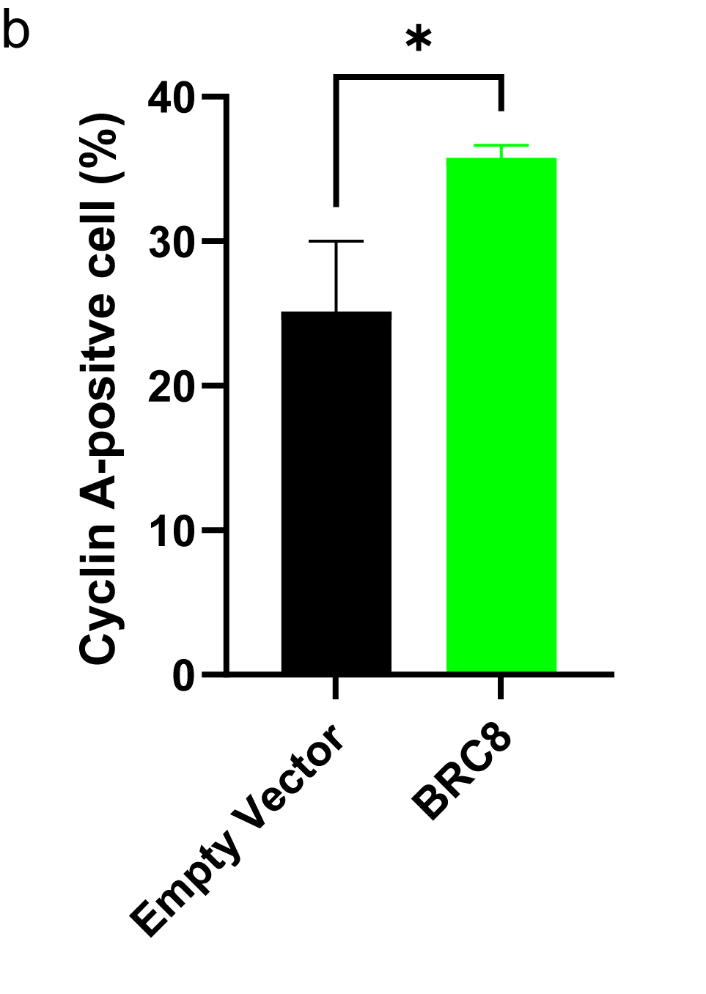


**Fig. s2** BRC8 increased the cell population during the S and G2 cell cycle phases. Percentage of cyclin A-positive cells in BRC8-expressing and control cells under basal conditions. Data are presented as mean ± standard deviation (SD; n = 3); **p* < 0.05 (Student’s *t*-test).
